# Supplementary material for: Iron Oxide (Fe3O4)-Supported SiO2 Magnetic Nanocomposites for Efficient Adsorption of Fluoride from Drinking Water: Synthesis, Characterization, and Adsorption Isotherm Analysis
Source: MDPI journal article supplement (doi:10.3390/w13111514), 2021-05-27
Supplement: s1 [file s1]

## Supplementary Information

# Iron oxide (Fe<sub>3</sub>O<sub>4</sub>) supported SiO<sub>2</sub> magnetic nanocomposites for efficient Adsorption of Fluoride from Drinking Water: Synthesis, Characterization and Adsorption Isotherm Analysis

Amna Sarwar<sup>1</sup>, Jin Wang<sup>2</sup>, Muhammad Saqib Khan<sup>1</sup>, Umar Farooq<sup>3</sup>, Nadia Riaz<sup>1\*</sup>, Abdul Nazir<sup>1</sup>, Qaisar Mahmood<sup>1\*\*</sup>, Abeer Hashem<sup>4,5</sup>, Al-Bandari Fahad Al-Arjani<sup>4</sup>, Abdulaziz A. Alqarawi<sup>6</sup> and Elsayed Fathi Abd\_Alal<sup>6</sup>

<sup>1</sup> Department of Environmental Sciences, COMSATS University Islamabad, Abbottabad Campus, 22060, Pakistan amna.sarwar@yahoo.com (AS), muhammadsaqib@yahoo.com (MS), nadiariazz@gmail.com (NR), mahmoodzju@gmail.com (QM)

<sup>2</sup> Department of Landscape and Architecture, School of Design, Shanghai Jiao Tong University, Shanghai 200240, China, wangjin100@sjtu.edu.cn (WJ)

<sup>3</sup> Department of Chemistry, COMSATS University Islamabad, Abbottabad Campus, 22060, Pakistan ufarooq@cuiatd.edu.pk (UF)

<sup>4</sup> Botany and Microbiology Department, College of Science, King Saud University, P.O. Box. 2460, Riyadh 11451, Saudi Arabia, habeer@ksu.edu.sa (HA)

<sup>5</sup> Mycology and Plant Disease Survey Department, Plant Pathology Research Institute, ARC, Giza 12511, Egypt, aarjani@ksu.edu.sa (AAA)

<sup>6</sup> Plant Production Department, College of Food and Agricultural Sciences, King Saud University, P.O. Box. 2460, Riyadh 11451, Saudi Arabia, alqarawi@ksu.edu.sa (AAA), eabdallah@ksu.edu.sa (EFA)

\* Correspondence: Q. Mahmood: mahmoodzju@gmail.com ; N. Riaz: nadiariazz@gmail.com

## S1. list of the chemicals and reagents used for the synthesis of iron oxide nanoparticle and their silica composites

| No | Chemical and Reagents                                                              | Brand/ % Purity            |
|----|------------------------------------------------------------------------------------|----------------------------|
| 1  | Iron (II) sulfate heptahydrate FeSO <sub>4</sub> .7H <sub>2</sub> O                | Sigma-Aldrich 98.0%purity  |
| 2  | Iron(III) chloride hexahydrate FeCl <sub>3</sub> .6H <sub>2</sub> O                | Sigma-Aldrich 98.0%purity  |
| 3  | Ammonia NH <sub>3</sub>                                                            | Analar Normapur 28-32%     |
| 4  | Sodium Silicate Na <sub>2</sub> O(SiO <sub>2</sub> ).H <sub>2</sub> O              | Sigma-Aldrich 98.0%purity. |
| 5  | Sodium hydroxide NaOH                                                              | Sigma-Aldrich 99.0% purity |
| 6  | Sodium carbonate Na <sub>2</sub> CO <sub>3</sub>                                   | Sigma-Aldrich 99.0%purity  |
| 7  | Sodium nitrate NaNO <sub>3</sub>                                                   | Daejung 99 %               |
| 8  | Calcium nitrate tetrahydrates Ca(NO <sub>3</sub> ) <sub>2</sub> .4H <sub>2</sub> O | Daejung 97.0%              |

|    |                            |                                      |
|----|----------------------------|--------------------------------------|
| 9  | Sodium Fluoride NaF        | Sigma-Aldrich 98.5%purity            |
| 10 | UV/Vis Spectrophotometer   | Scilogex SP-UV1100                   |
| 11 | pH meter                   | PHS-25CW/Benchtop pH/mV Meter, BANTE |
| 12 | Muffle Furnace             | (KLS-WS Thermconcept)                |
| 13 | Magnetic stirring hotplate | 78-1 Jabtech, Daihan                 |
| 14 | Drying oven                | Thermconcept                         |
